# Supplementary material for: Polymeric nanocapsules templated on liquid cores as efficient photoreactors
Source: Royal Society of Chemistry journal article supplement (doi:10.1039/c6ra00431h), 2016-01-01
Supplement: c6ra00431h1.pdf [file c6ra00431h1.pdf]

# Polymeric Nanocapsules Templated on Liquid Cores as Efficient Photoreactors

Joanna Szafraniec,<sup>†</sup> Joanna Odrobińska,<sup>†</sup> Szczepan Zapotoczny<sup>\*†</sup>

<sup>†</sup>*Jagiellonian University, Faculty of Chemistry, Ingardena 3, 30-060 Krakow, Poland*

<sup>\*</sup> e-mail: zapotocz@chemia.uj.edu.pl

## General characterization of polymers

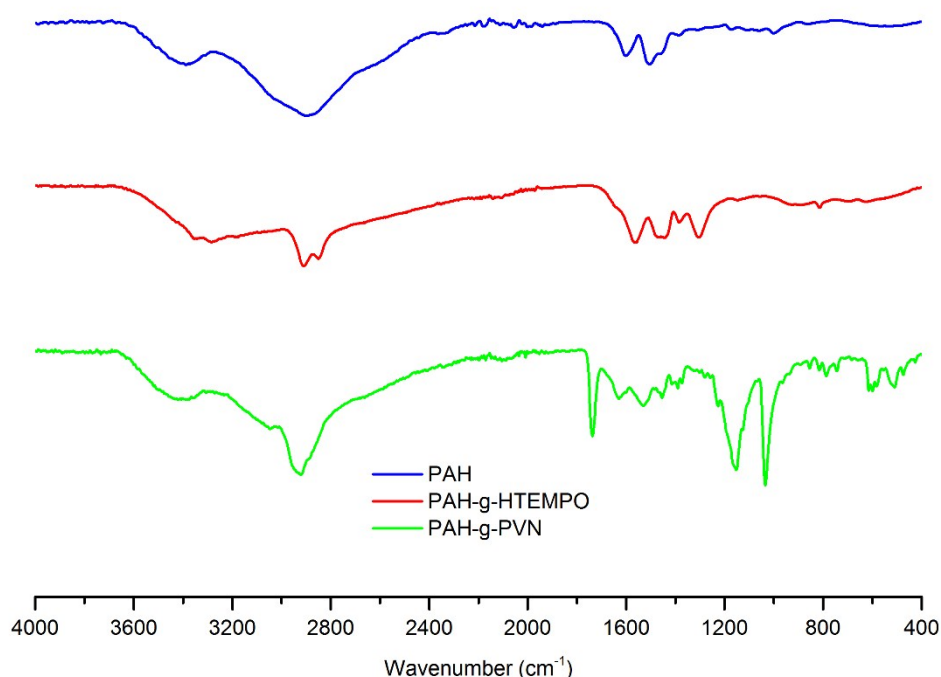

**Figure S1** FT-IR spectra of PAH, PAH-*graft*-HTEMPO and PAH-*graft*-PVN.

Several bands characteristic for aromatic groups could be noticed in the FT-IR spectrum of PAH-*graft*-PVN: C-H out-of-plane bending (856 cm<sup>-1</sup>, 893 cm<sup>-1</sup>, 953 cm<sup>-1</sup>), C=C stretching (1452 cm<sup>-1</sup>), C-H stretching (2921 cm<sup>-1</sup>).

The FT-IR calibration was performed to calculate the content of VN in PAH-*graft*-PVN using the calibration curve shown in Figure S1. FT-IR spectra of series of blends of PAH and VN mixed at different weight ratios were recorded and integrated within 834 cm<sup>-1</sup>-865 cm<sup>-1</sup> range characteristic for C-H bending in aromatic rings.

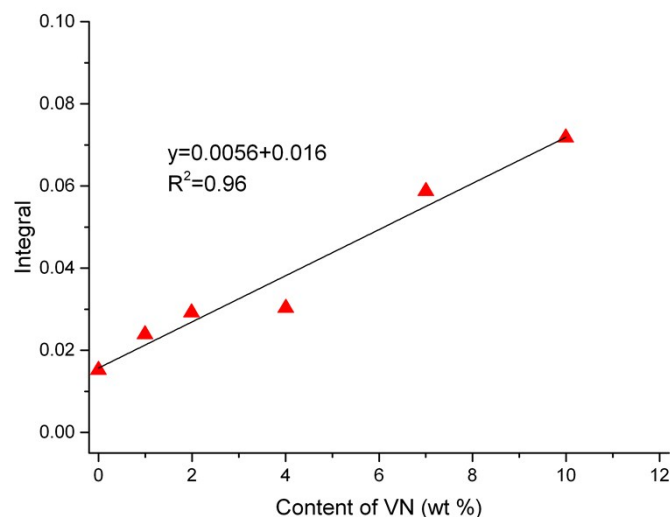

**Figure S2** Calibration curve showing the dependence of the integrals of the band in the range 834 cm<sup>-1</sup>- 865 cm<sup>-1</sup> versus the content of VN in the PAH/VN blends.

**Table S1** Number-weighted particle size of PAH-*graft*-PVN at pH= 3 and pH= 7 obtained from DLS measurements before and after heating.

| Sample        | Before heating |       | After heating |      |
|---------------|----------------|-------|---------------|------|
|               | pH=3           | pH=7  | pH=3          | pH=7 |
| Diameter (nm) | 75±7           | 102±6 | 79±5          | 94±3 |

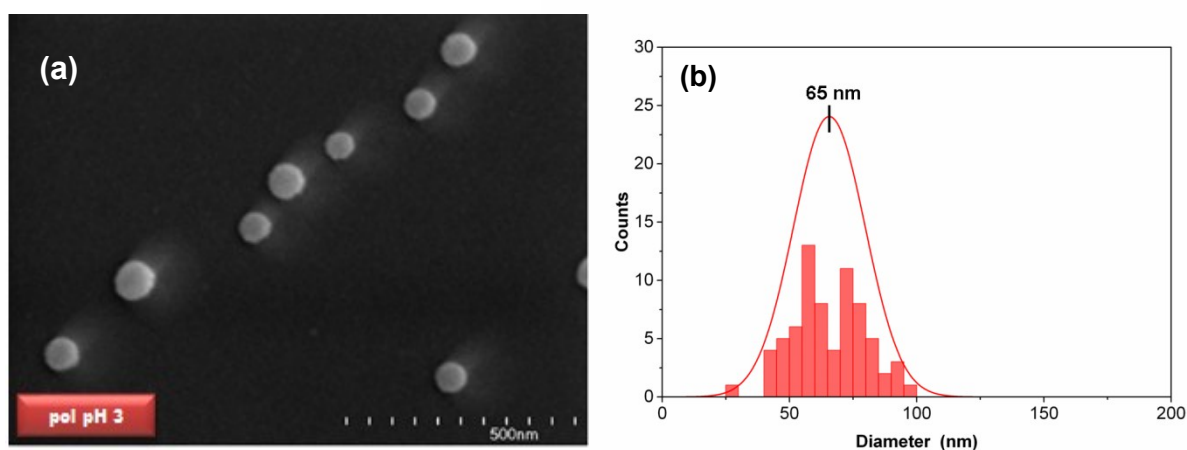

**Figure S3** SEM image of the copolymer aggregates deposited from the aqueous solution at pH=3 (a) and histogram of their size distribution (b).

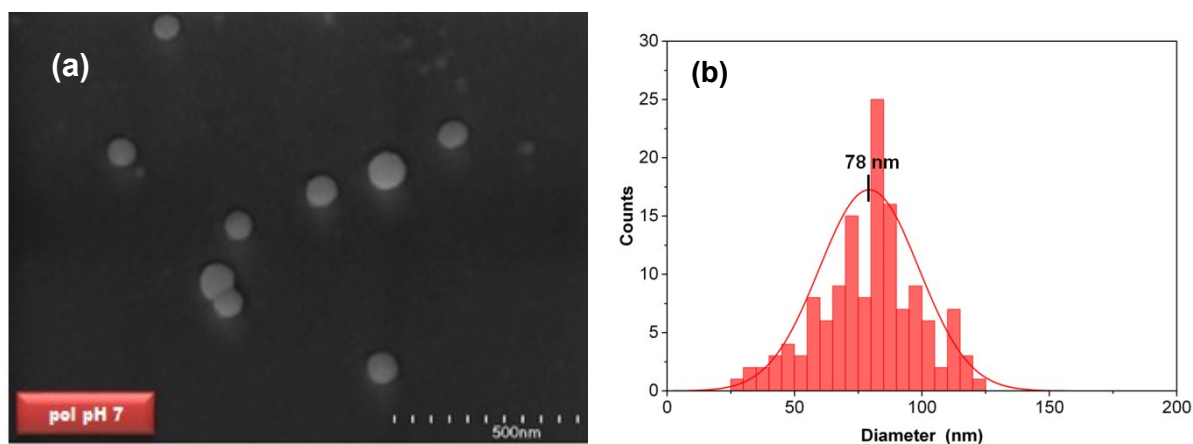

**Figure S4** SEM image of the copolymer aggregates deposited from the aqueous solution at pH=7 (a) and histogram of their size distribution (b).

### Fluorescence studies of PAH-graft-PVN

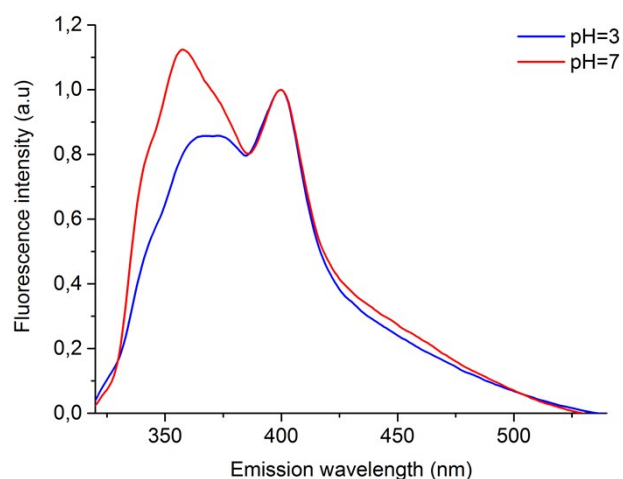

**Figure S5** Normalized steady-state emission spectra of PAH-graft-PVN solution (0.1 g/L) in 0.1 M NaCl at pH=3 and pH=7 ( $\lambda_{\text{ex}} = 280$  nm).

### Capsules templated on liquid cores

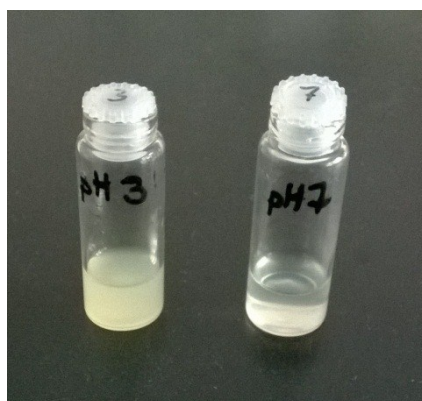

**Figure S6** Photographs of the capsules stabilized by PAH-graft-PVN on toluene cores at pH=3 and pH=7.

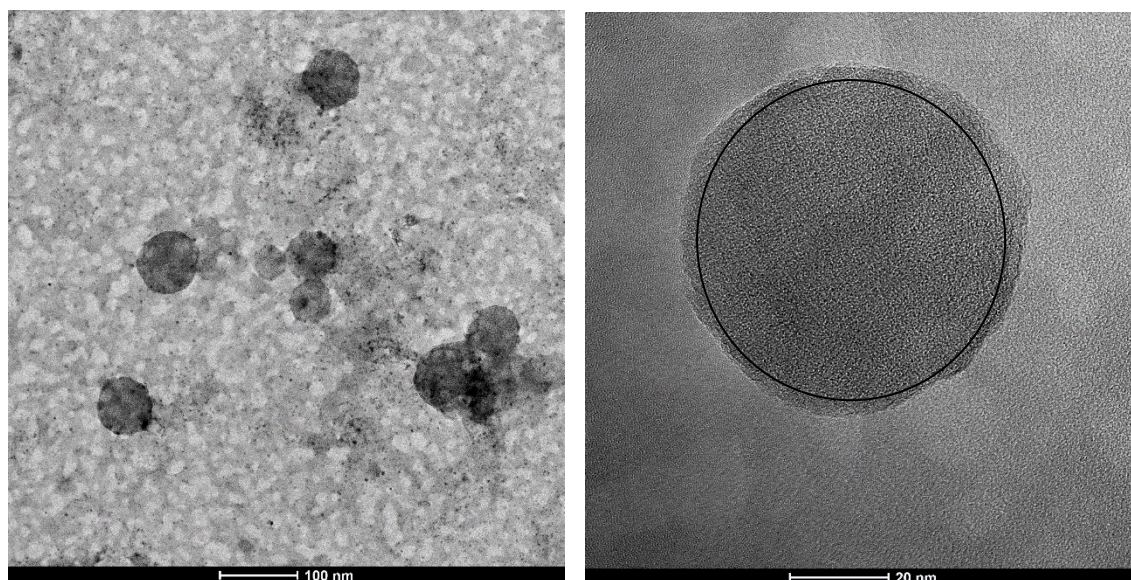

**Figure S7** TEM images of the capsules with C18/ferrocene cores deposited from their aqueous suspension.

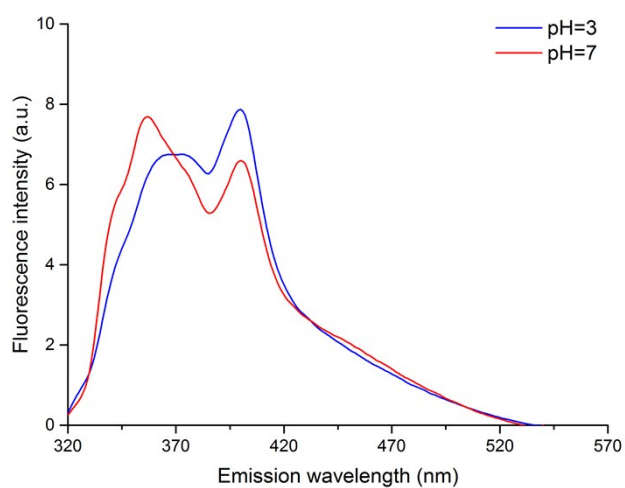

**Figure S8** Steady-state emission spectra of capsules stabilized by PAH-*graft*-PVN at pH=3 and pH=7 excited at 280 nm.

## Photophysical properties of Pe in PAH-graft-PVN aggregates and capsules

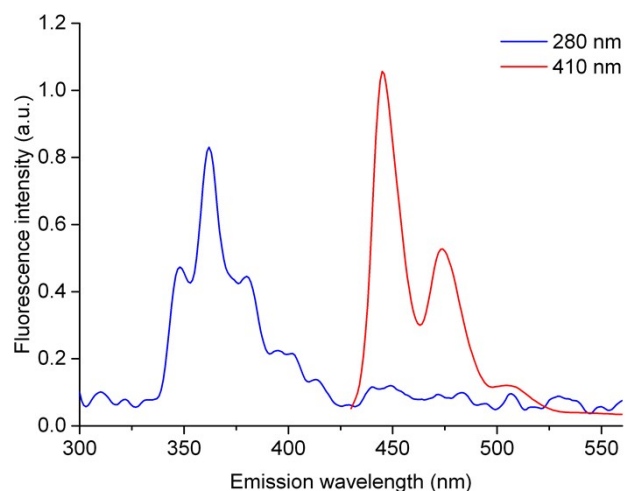

**Figure S9** Steady-state emission spectra of perylene ( $\lambda_{\text{ex}} = 410$  nm) and naphthalene ( $\lambda_{\text{ex}} = 280$  nm) in toluene solutions.

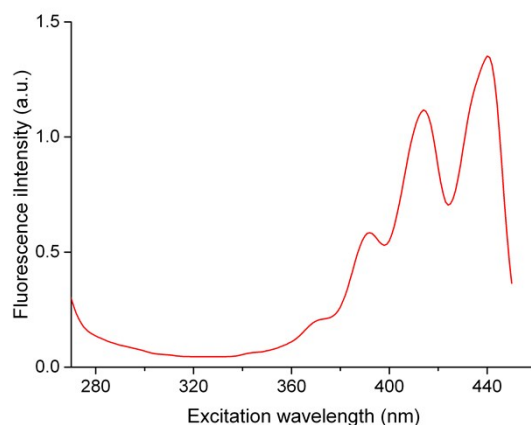

**Figure S10** Excitation spectrum of perylene dissolved in toluene ( $c=10^{-5}$  M,  $\lambda_{\text{em}} = 460$  nm).

The efficiency of energy transfer was calculated using the following ratiometric equation:

$$E_{\text{rel}} = \frac{I_A}{I_A + I_D}$$

where  $I_A$  and  $I_D$  correspond to the total acceptor (A) and donor (D) fluorescence intensities.

The values of  $I_A$  and  $I_D$  were determined as appropriate integrals from the deconvoluted spectra of the aggregates or capsules (Fig. 8) into the isolated A (naphthalene) and D (perylene) components.

## Photooxidation of solubilized and encapsulated Pe

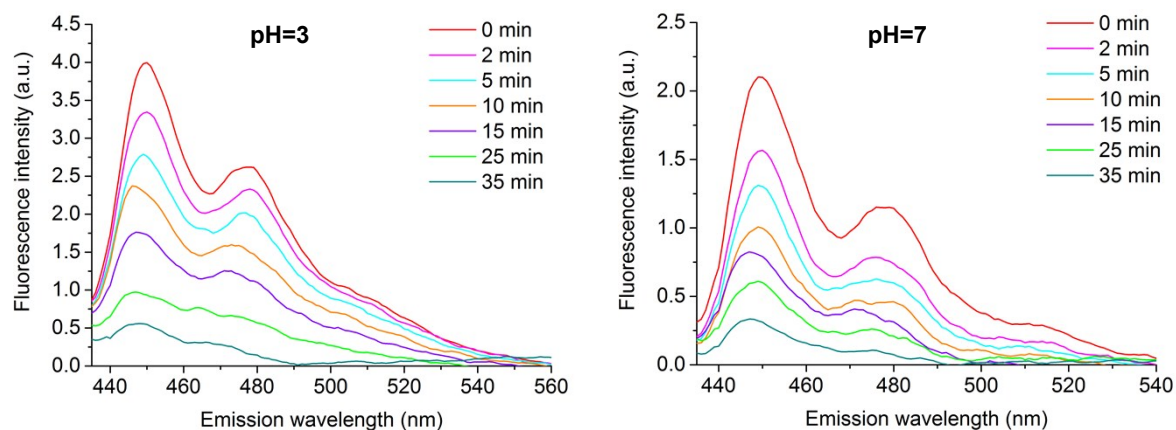

**Figure S11** Steady-state emission spectra of Pe ( $\lambda_{\text{ex}} = 410$  nm) solubilized in PAH-*graft*-PVN after various time of irradiation in Rayonet photoreactor.

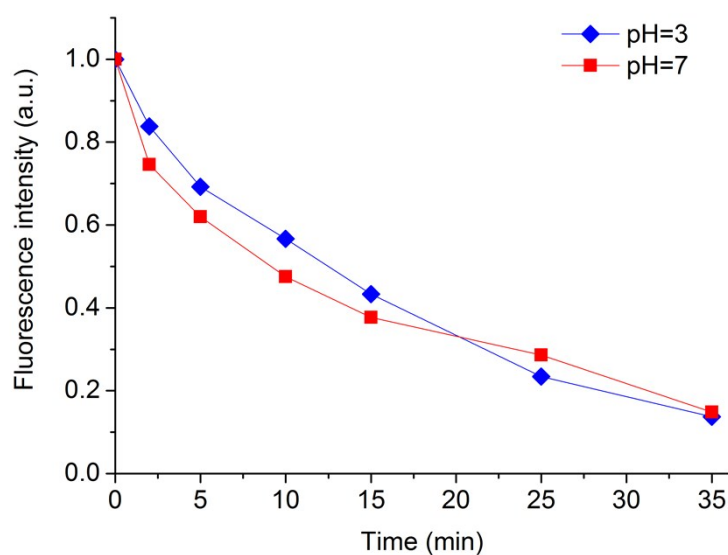

**Figure S12** Normalized fluorescence intensity ( $\lambda_{\text{ex}} = 410$  nm,  $\lambda_{\text{em}} = 450$  nm) for perylene solubilized in PAH-*graft*-PVN after various times of irradiation in Rayonet photoreactor.

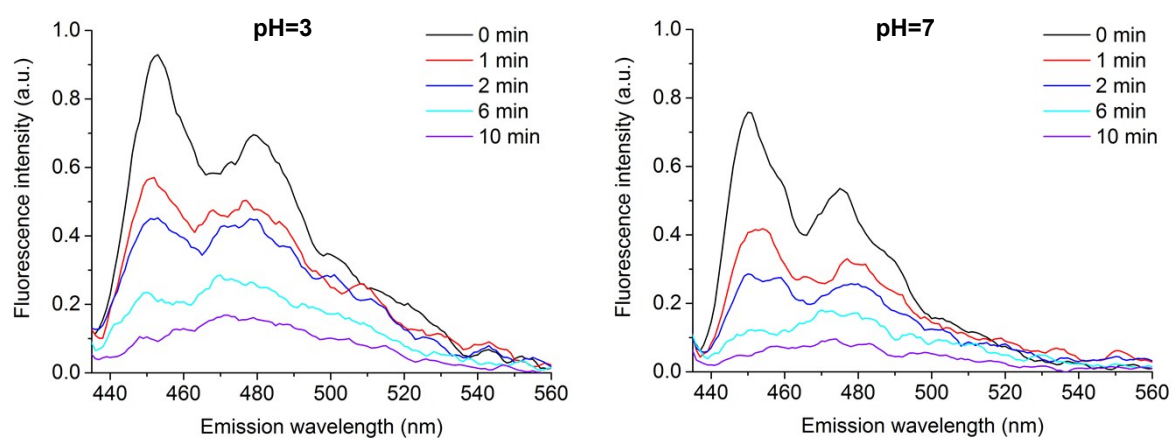

**Figure S13** Steady-state emission spectra of Pe ( $\lambda_{\text{ex}} = 410 \text{ nm}$ ) encapsulated in the capsules after various times of irradiation in Rayonet photoreactor.

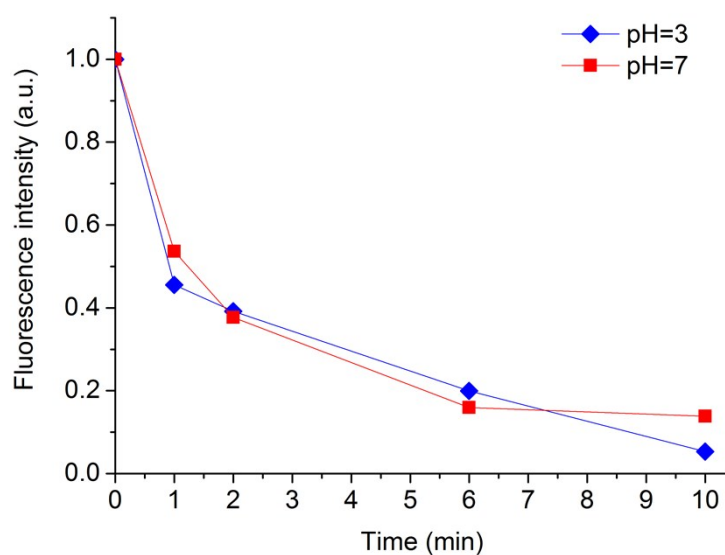

**Figure S14** Normalized fluorescence intensity ( $\lambda_{\text{ex}} = 410 \text{ nm}$ ,  $\lambda_{\text{em}} = 450 \text{ nm}$ ) for perylene encapsulated in the capsules after various times of irradiation in Rayonet photoreactor.
